# Supplementary material for: IL-3 and Oncogenic Abl Regulate the Myeloblast Transcriptome by Altering mRNA Stability
Source: PubMed Central journal article supplement (PMC2758590; doi:10.1371/journal.pone.0007469), 2009-10-15
Supplement: pone.0007469.s004.pdf [file pone.0007469.s004.pdf]

| Category ID | Category Name                              | #Genes Category | #Genes Assigned | #Genes Expected | #Genes Enriched | p-value  | Corrected p-value |
|-------------|--------------------------------------------|-----------------|-----------------|-----------------|-----------------|----------|-------------------|
| GO:0044424  | intracellular part                         | 13399           | 716             | 590.5           | 125.5           | 2.40E-17 | <0.001            |
| GO:0005622  | intracellular                              | 13868           | 728             | 611.2           | 116.8           | 1.50E-15 | <0.001            |
| GO:0005634  | nucleus                                    | 6445            | 397             | 284             | 113             | 2.60E-15 | <0.001            |
| GO:0043231  | intracellular membrane-bounded organelle   | 10278           | 556             | 453             | 103             | 1.50E-11 | <0.001            |
| GO:0043227  | membrane-bounded organelle                 | 10291           | 556             | 453.5           | 102.5           | 2.00E-11 | <0.001            |
| GO:0007049  | cell cycle                                 | 1120            | 97              | 49.4            | 47.6            | 1.30E-10 | <0.001            |
| GO:0000278  | mitotic cell cycle                         | 484             | 53              | 21.3            | 31.7            | 1.10E-09 | <0.001            |
| GO:0043229  | intracellular organelle                    | 11513           | 599             | 507.4           | 91.6            | 1.70E-09 | <0.001            |
| GO:0016071  | mRNA metabolic process                     | 507             | 51              | 22.3            | 28.7            | 3.90E-08 | <0.001            |
| GO:0000087  | M phase of mitotic cell cycle              | 314             | 37              | 13.8            | 23.2            | 5.70E-08 | <0.001            |
| GO:0044428  | nuclear part                               | 1762            | 125             | 77.7            | 47.3            | 6.60E-08 | <0.001            |
| GO:0000956  | nuclear-transcribed mRNA catabolic process | 34              | 11              | 1.5             | 9.5             | 1.30E-07 | <0.001            |
| GO:0007067  | mitosis                                    | 311             | 36              | 13.7            | 22.3            | 1.30E-07 | <0.001            |
| GO:0006402  | mRNA catabolic process                     | 36              | 11              | 1.6             | 9.4             | 2.50E-07 | <0.001            |
| GO:0003723  | RNA binding                                | 1019            | 80              | 44.9            | 35.1            | 4.00E-07 | 0.002             |
| GO:0022403  | cell cycle phase                           | 549             | 51              | 24.2            | 26.8            | 4.70E-07 | 0.002             |
| GO:0006401  | RNA catabolic process                      | 39              | 11              | 1.7             | 9.3             | 6.20E-07 | 0.002             |
| GO:0006396  | RNA processing                             | 689             | 59              | 30.4            | 28.6            | 9.20E-07 | 0.002             |
| GO:0008380  | RNA splicing                               | 380             | 39              | 16.7            | 22.3            | 9.40E-07 | 0.002             |
| GO:0043285  | biopolymer catabolic process               | 905             | 72              | 39.9            | 32.1            | 9.50E-07 | 0.002             |
| GO:0006397  | mRNA processing                            | 464             | 44              | 20.4            | 23.6            | 1.70E-06 | 0.002             |
| GO:0022402  | cell cycle process                         | 655             | 56              | 28.9            | 27.1            | 1.80E-06 | 0.002             |
| GO:0009057  | macromolecule catabolic process            | 1025            | 78              | 45.2            | 32.8            | 1.80E-06 | 0.002             |
| GO:0043283  | biopolymer metabolic process               | 7835            | 414             | 345.3           | 68.7            | 2.30E-06 | 0.002             |
| GO:0043170  | macromolecule metabolic process            | 8106            | 426             | 357.2           | 68.8            | 2.60E-06 | 0.004             |
| GO:0000279  | M phase                                    | 432             | 41              | 19              | 22              | 3.70E-06 | 0.006             |
| GO:0051726  | regulation of cell cycle                   | 463             | 43              | 20.4            | 22.6            | 3.70E-06 | 0.006             |
| GO:0051301  | cell division                              | 405             | 39              | 17.8            | 21.2            | 4.40E-06 | 0.006             |
| GO:0044260  | cellular macromolecule metabolic process   | 7947            | 417             | 350.2           | 66.8            | 4.50E-06 | 0.006             |
| GO:0008026  | ATP-dependent helicase activity            | 131             | 19              | 5.8             | 13.2            | 4.80E-06 | 0.006             |
| GO:0070035  | purine NTP-dependent helicase activity     | 131             | 19              | 5.8             | 13.2            | 4.80E-06 | 0.006             |
| GO:0044265  | cellular macromolecule catabolic process   | 966             | 73              | 42.6            | 30.4            | 5.10E-06 | 0.008             |
| GO:0034960  | cellular biopolymer metabolic process      | 7783            | 409             | 343             | 66              | 5.20E-06 | 0.008             |

Table 1. Gene Ontology analysis of transcripts of top 1000 ranked probe sets for stabilization by IL-3.
